# Supplementary material for: Transcriptional Regulation of Carbohydrate Utilization Pathways in the Bifidobacterium Genus
Source: Front Microbiol. 2016 Feb 9;7:120. doi: 10.3389/fmicb.2016.00120 (PMC4746261; doi:10.3389/fmicb.2016.00120)
Supplement: Supplementary file 4 [file Table4.XLSX]

## Sheet: GH
Table S4. Genes encoding Glycosyl Hydrolases (GHs) identified in reconstructed carbohydrate utilization regulons of bifidobacteria.
Regulon	GH family1	Function	Name	Localization1	Gene locus tag
AbfR	GH51	Alpha-N-arabinofuranosidase (EC 3.2.1.55)	abfA	Intracellular	BLA_0055,BL1611,BL0544
AouR	GH127	Non-reducing end beta-L-arabinofuranosidase (EC 3.2.1.185)	hypBA1	Intracellular	BDP_1703,BL0422,BLA_1513
AouR	GH121	Beta-L-arabinobiosidase (EC 3.2.1.187)	hypBA2	Extracellular	BDP_1701
Bbr_0019	GH32	Glycosyl hydrolase family 32	Bbr_0020	Intracellular	Bbr_0020
BDP_2111	GH43	Glycoside hydrolase family 43	BDP_2107	Intracellular	BDP_2107
BDP_2111,BBNG_01789	GH43	Glycosyl hydrolase family 43	BDP_2106	Intracellular	BDP_2106,BBNG_01788
BDP_2131	GH31	Glycoside hydrolase, family 31	agl1	Intracellular	BDP_2158,BIFANG_02222
BfrR	GH32	Beta-fructosidase (EC 3.2.1.26)	bfrA	Intracellular	BIFANG_03427,BAD_1325,Blon_2056
BgaR	GH42	Beta-galactosidase (EC 3.2.1.23)	bgaB	Intracellular	BIFANG_02318,BBNG_01731,BLA_0462,BL1168,BDP_0657,Bbr_0529
BgaR	GH51	Alpha-N-arabinofuranosidase (EC 3.2.1.55)	abfA1	Intracellular	BL1166,BDP_0658
BglR	GH1	Beta-glucosidase (EC 3.2.1.21)	bglB	Intracellular	BIFANG_03565,BDP_0949,BAD_1287,BIFBRE_04413,Bbr_1655
BgrT1	GH3	Beta-glucosidase (EC 3.2.1.21)	bglX1	Intracellular	BIFBRE_04630,BDP_1657,Blon_0625,BIFANG_03371,BAD_1194
BgrT2, BgrT8	GH3	Beta-glucosidase (EC 3.2.1.21)	bglX2	Intracellular	BLA_0893,BL1757,BIFANG_03380,BDP_1671,BAD_1197,BIFBRE_04624,Bbr_1442
BgrT3	GH42	Beta-galactosidase (EC 3.2.1.23)	bga	Intracellular	BDP_1683,BAD_1211,BLA_0044
BgrT4	GH3	Beta-glucosidase (EC 3.2.1.21)	bglX4	Intracellular	BDP_0208
BgrT4	GH43	Beta-xylosidase (EC 3.2.1.37)	xynB	Intracellular	BDP_1677
BgrT4	GH5	Glucan 1,3-beta-glucosidase precursor (EC 3.2.1.58)	bglY	Intracellular	BDP_1678
BgrT5	GH94	Cellodextrin phosphorylase (EC 2.4.1.49)	cbpA	Intracellular	BDP_2127, BAD_0439
BgrT8	GH30	Glycosyl hydrolases family 30	GH30	Intracellular	Bbr_0306
BIFBRE_03467	GH13	Alpha-glucosidase (EC 3.2.1.20)	Bbr_0559	Intracellular	Bbr_0559
BL0176	GH51	Alpha-N-arabinofuranosidase (EC 3.2.1.55)	abfA	Intracellular	BAD_1524,BL0181,BDP_2091
BL0185	GH1	Beta-glucosidase (EC 3.2.1.21)	bglS	Intracellular	BAD_0156
BL0185	GH43	Glycoside hydrolase, family 43	BAD_0146	Intracellular	BIFANG_03013,BL0184,BDP_0237
BL0185	GH43	Glycoside hydrolase, family 43	BDP_0236	Extracellular	BL0183,BDP_0236
BL0185	GH43	Alpha-L-arabinofuranosidase	abfA2	Intracellular	BIFANG_03011,BDP_0239,BL0187,BAD_0152
BL0185	GH43	Glycoside hydrolase, family 43	BL0182	Intracellular	BL0182
BLA_0143	GH1	Beta-glucosidase (EC 3.2.1.21)	bglA	Intracellular	BDP_0124
BLA_0143	GH36	alpha-galactosidase	BDP_0134	Intracellular	BDP_0134
Blon_2415	GH42	Beta-galactosidase (EC 3.2.1.23)	lacZ5	Intracellular	Blon_2416
Blon_2415	GH43	endo-1,4-beta-xylanase	xylD	Intracellular	Blon_2411
CldR	GH1	Beta-glucosidase (EC 3.2.1.21)	cldC	Intracellular	Bbr_0109
CscR	GH32	Sucrase (EC 3.2.1.26)	cscA	Intracellular	BIFANG_02470,BDP_1603,BAD_1150,BIFBRE_04736,Blon_0787,BL0105,BLA_0819,BIFGAL_02825
FruR	GH125	Six-hairpin glycosidases superfamily protein	PF06824	Intracellular	Blon_0876,BDP_1535,BL1338
GalR2	GH2	Beta-galactosidase small chain	PF02929	Intracellular	BIFANG_02310
GosR	GH42	Beta-galactosidase, GH42 family (EC 3.2.1.23)	bgaB	Intracellular	BAD_1401,BIFANG_03660,BDP_1908,Bbr_0420
GosR	GH53	Arabinogalactan endo-beta-1,4-galactanase (EC 3.2.1.89)	galA	Extracellular	Bbr_0422,BL0257,BDP_2054
LacR	GH2	Beta-galactosidase (EC 3.2.1.23)	lacZ	Intracellular	Blon_2334,BIFBRE_02894
LacR	GH2	Beta-galactosidase (EC 3.2.1.23)	lacZ	Intracellular	Bbr_0010
LacR,GalR2	GH17	Lactose and galactose permease, GPH translocator family	lacS	Intracellular	BAD_1604,BDP_1646,BIFANG_02313,BAD_1188,BIFBRE_04540
MalR1/R2/R3	GH13	Pullulanase (EC 3.2.1.41)	pulA	Intracellular	BIFGAL_04434,BLA_0903,BAD_1559
MalR1/R2/R3	GH13	Alpha-glucosidase	agl3	Intracellular	BDP_2200,BIFGAL_04430,BLA_0907
MalR1/R2/R3	GH13	Alpha-amylase (EC 3.2.1.1)8	aapA#	Extracellular	BIFANG_02967,BDP_1029,BAD_0708,BIFBRE_03006,BIFGAL_02672,Bbr_0123
MalR1/R2/R3	GH13	Alpha-glucosidase (EC 3.2.1.20)	aglA	Intracellular	BAD_1561,Blon_0137,BLA_0914,BLA_0706,BIFBRE_02991,BL0529,Bbr_0111
MalR1/R2/R3	GH77	4-alpha-glucanotransferase (amylomaltase) (EC 2.4.1.25)	malQ	Intracellular	Blon_0139,BLA_0908,BIFANG_02291,BDP_2201,BIFGAL_04426,BAD_1560,BL0527,BIFBRE_02998,Bbr_0116
MalR1/R2/R3,AraQ	GH77	4-alpha-glucanotransferase (amylomaltase) (EC 2.4.1.25)	malQ1	Intracellular	BLA_0353,Blon_2246,BL1570,BAD_0308,BDP_0418,BIFANG_03552,BIFBRE_04418,Bbr_1650
MalR4	GH31	Maltodextrin glucosidase (EC 3.2.1.20)	aglL	Intracellular	BDP_2182
MalR5	GH13	Alpha-glucosidase (EC 3.2.1.20)	malL	Intracellular	BDP_0624,BIFANG_03399,BAD_0452,BAD_0971
MelR1	GH13	Alpha-1,4-glucosidase	melD	Intracellular	Bbr_1857
MelR1	GH36	Alpha-galactosidase	melE	Intracellular	Bbr_1856
MsmR1	GH36	Alpha-galactosidase 1 (EC:3.2.1.22)	agaL1	Intracellular	BDP_0487
NagR	GH112	1,3-beta-galactosyl-N-acetylhexosamine phosphorylase (EC:2.4.1.211)	lnpA	Intracellular	BL1641,Blon_2174,BIFBRE_04496,Bbr_1587
NanR	GH33	Sialidase (EC 3.2.1.18)	nanH	Intracellular	Blon_0646,Bbr_0171
ScrR	GH13	oligo-1,6-glucosidase	BDP_0111	Intracellular	BDP_0111
ScrR	GH13	Sucrose phosphorylase (EC 2.4.1.7)	scrP	Intracellular	BIFBRE_02984,BIFANG_02319,BLA_0129,BDP_0109,Blon_0128,BAD_0078,BL0536,Bbr_0100
ScrR	GH32	Fructofuranosidase	fosC	Intracellular	Bbr_1324
XosR	GH43	Beta-xylosidase (EC 3.2.1.37)	xynB	Intracellular	BAD_0428,BDP_0568,BIFANG_03776
AraQ	GH36	Alpha-galactosidase (EC 3.2.1.22)	aga	Intracellular	BAD_1528
AraQ	GH13	1,4-alpha-glucan (glycogen) branching enzyme, GH-13-type (EC 2.4.1.18)	glgB	Intracellular	BIFBRE_03698,Bbr_0746,Blon_1761,BL0999
AraQ,BL0176	GH127	Putative glycosyl hydrolase of unknown function, DUF1680	PF07944	Intracellular	BAD_1529,BL0174
1GH families are according to CAZy database
2Cellular localization of GH enzymes was predicted using the SignalP 4.1 server (http://www.cbs.dtu.dk/services/SignalP/).
*In B.breve, aapA (aka apuB) was previosuly charcterized as extracellular type II amylopullulanase, see 18689518
